# Supplementary material for: Rational design of an acridine-derived click chemistry-based artificial metallo-nuclease
Source: Royal Society of Chemistry journal article supplement (doi:10.1039/d6cb00097e), 2026-06-15
Supplement: d6cb00097e1.pdf [file d6cb00097e1.pdf]

## Rational Design of an Acridine-derived Click Chemistry-based Artificial Metallo-Nuclease

†Oliver Gould,† Alex Gibney,† Rebecca Lynn, Simon Poole, Bríonna McGorman,\* and Andrew Kellett\*

*School of Chemical Sciences, Dublin City University, Glasnevin, Dublin 9, Dublin, Ireland.*

† These authors contributed equally.

[andrew.kellett@dcu.ie](mailto:andrew.kellett@dcu.ie)

### Supplementary Figures and Data

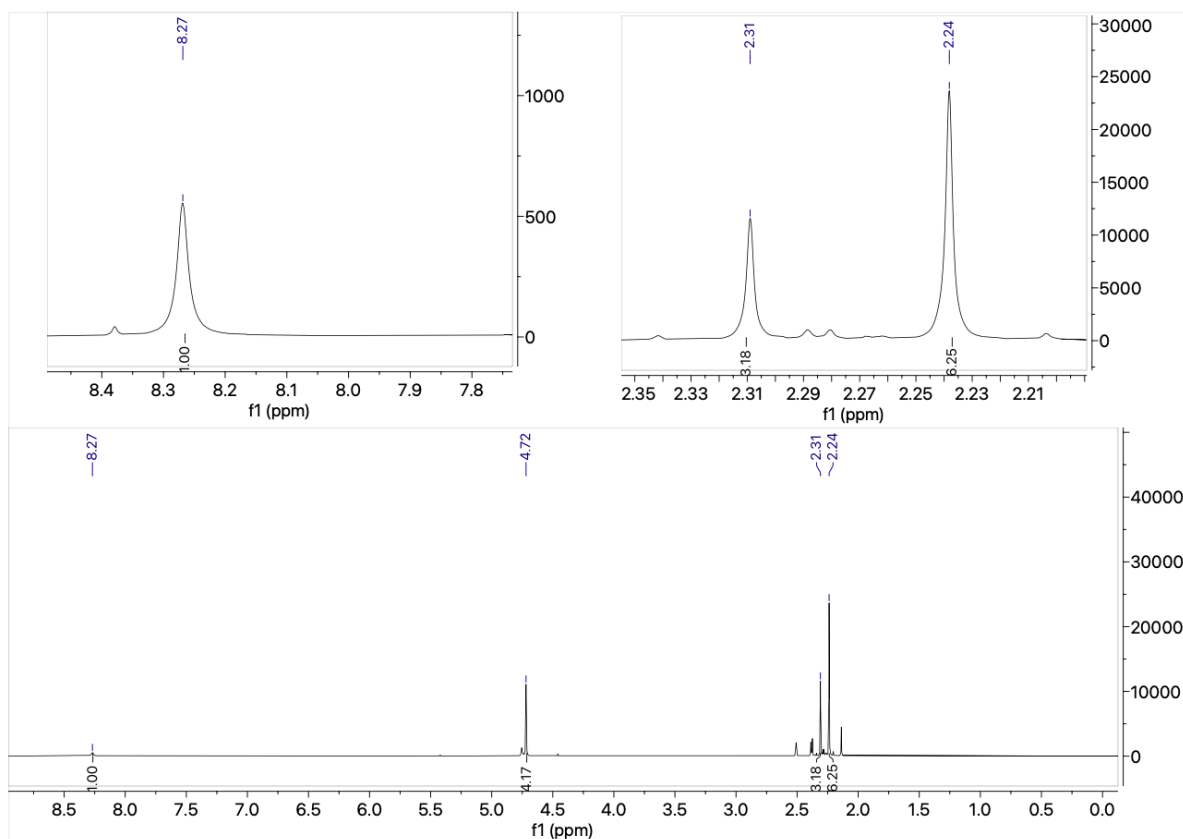

**Figure S1:** <sup>1</sup>H NMR spectrum of dibromide (1) in DMSO-d<sub>6</sub>

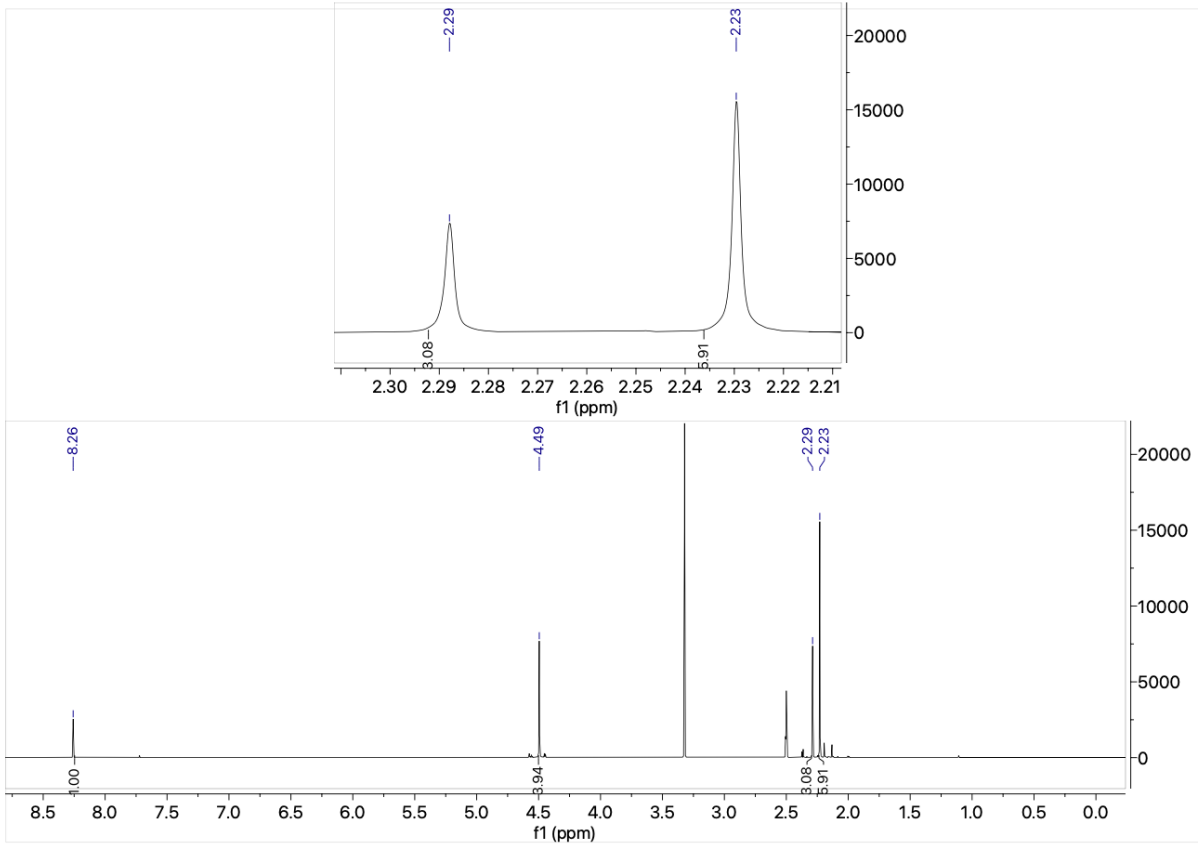

Figure S2: <sup>1</sup>H NMR spectrum of diazide (2) in DMSO-d<sub>6</sub>

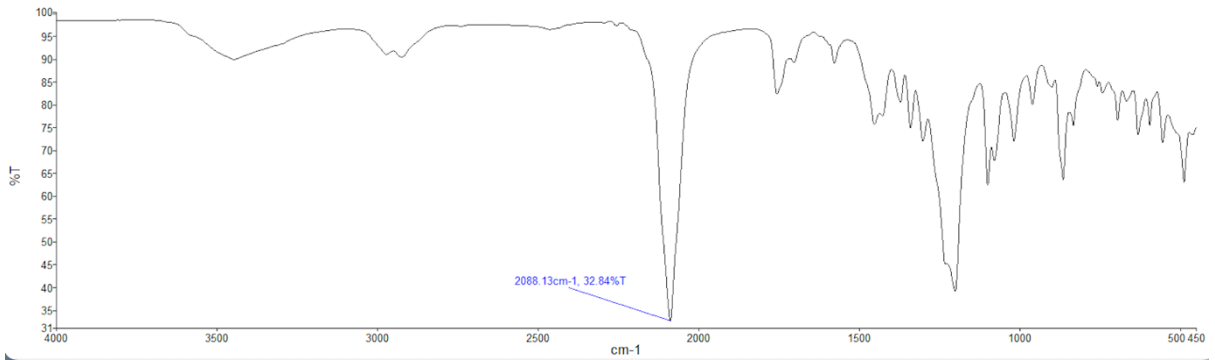

Figure S3: FTIR spectrum of 2 showing azide peak at 2088 cm<sup>-1</sup>

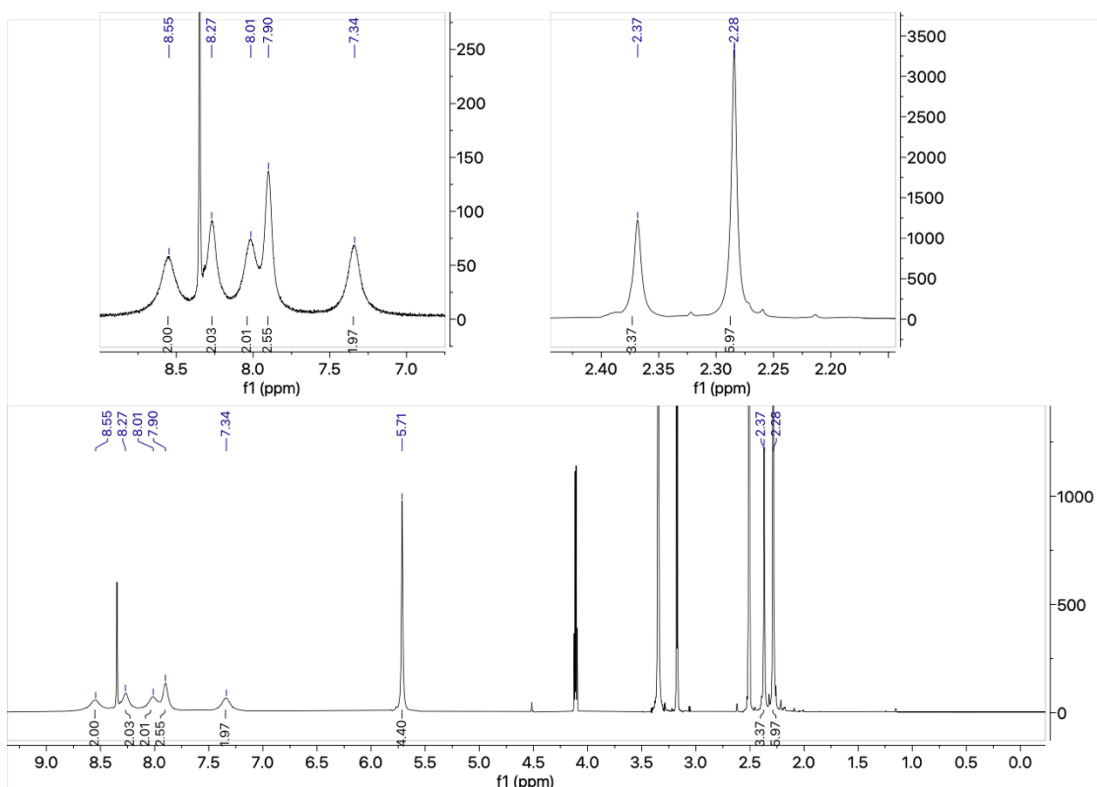

Figure S4:  $^1\text{H}$  NMR spectrum of DC-Py (**3**) in  $\text{DMSO-d}_6$

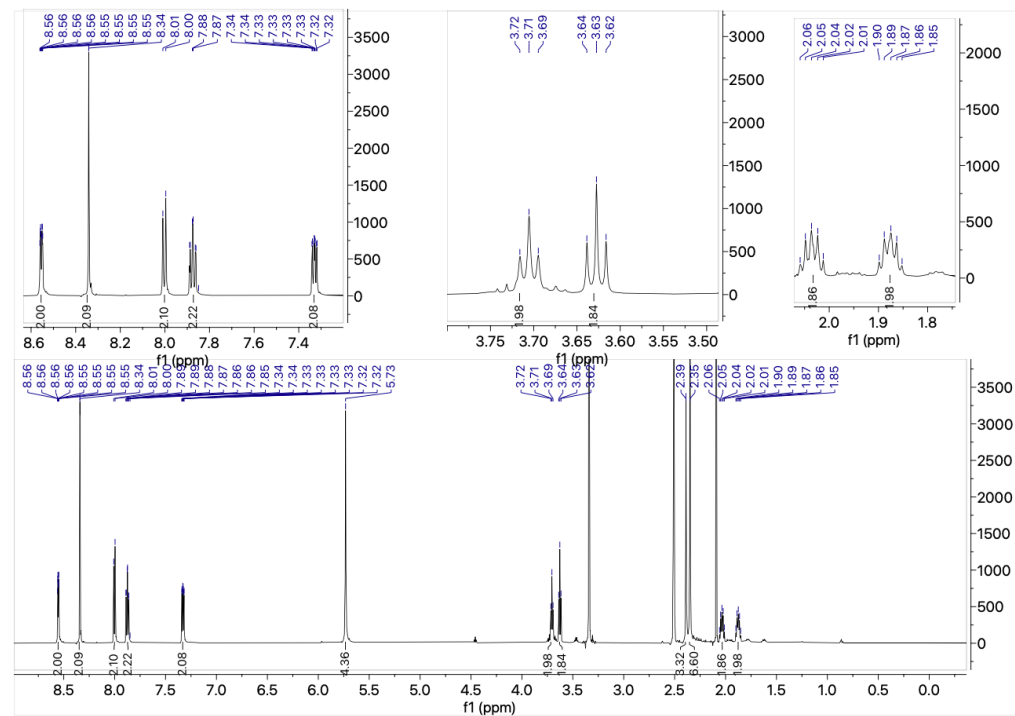

Figure S5:  $^1\text{H}$  NMR spectrum of DC-PyBr (**4**) in  $\text{DMSO-d}_6$

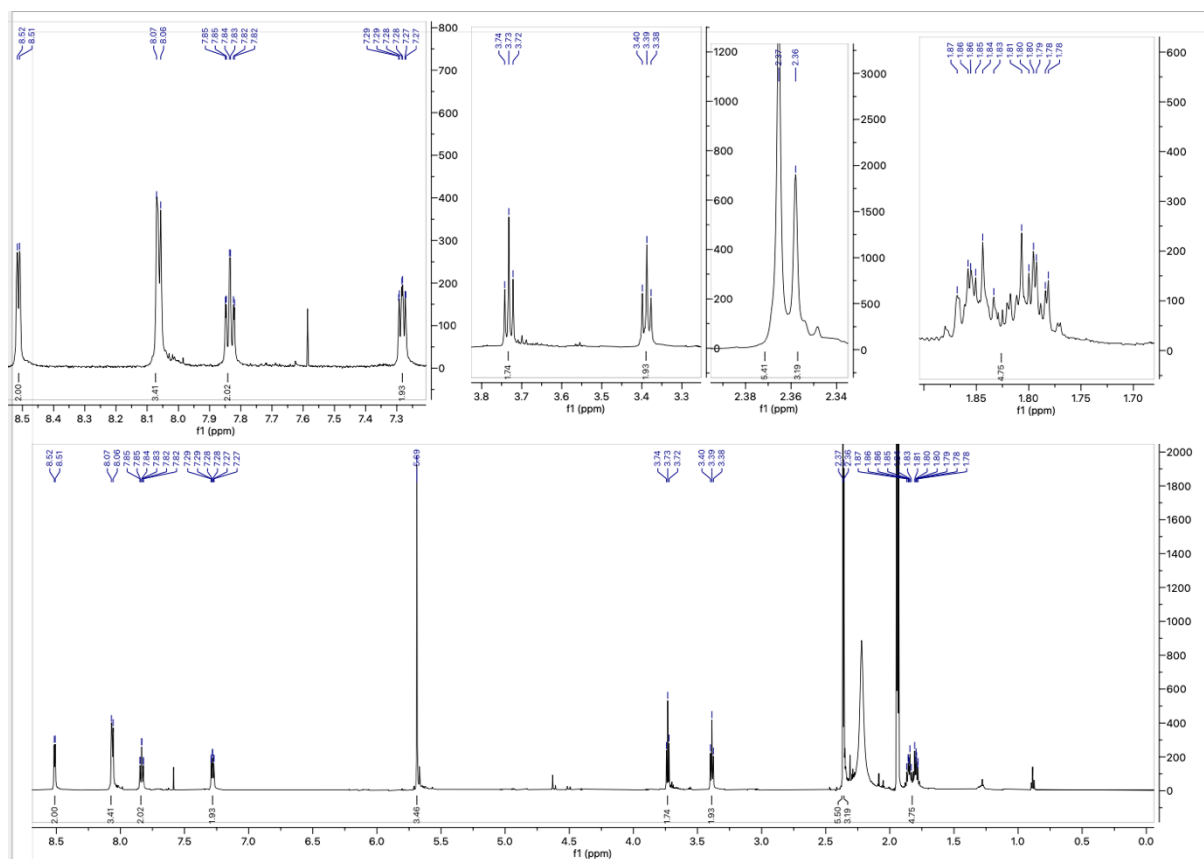

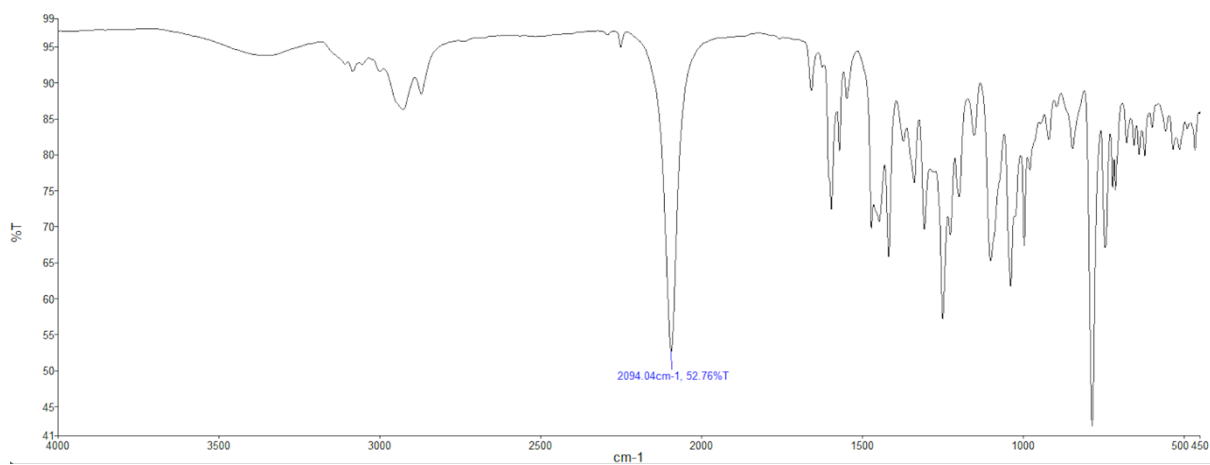

Figure S8: FTIR spectrum of 5, showing azide signal at 2094 cm<sup>-1</sup>.

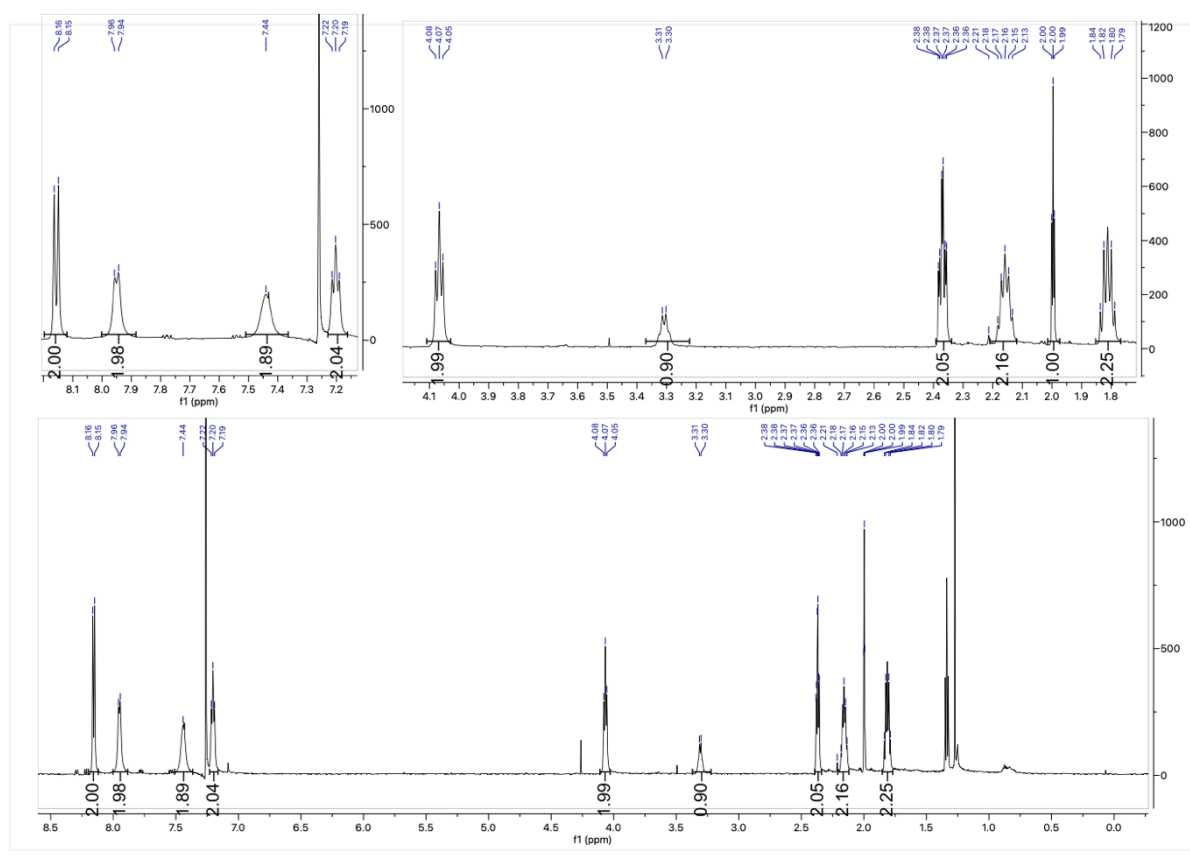

Figure S9: <sup>1</sup>H NMR spectrum of Hexynyl acridine (6) in CDCl<sub>3</sub>.



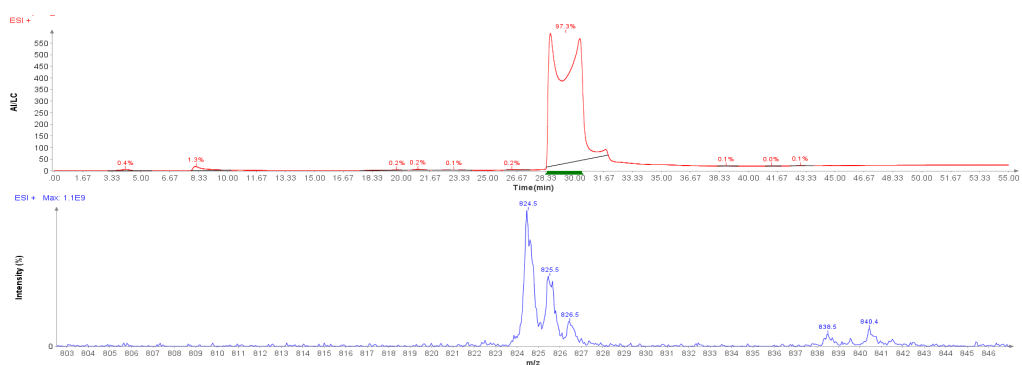

Figure S12: LC-MS and ESI-MS of DC-PyA (7).

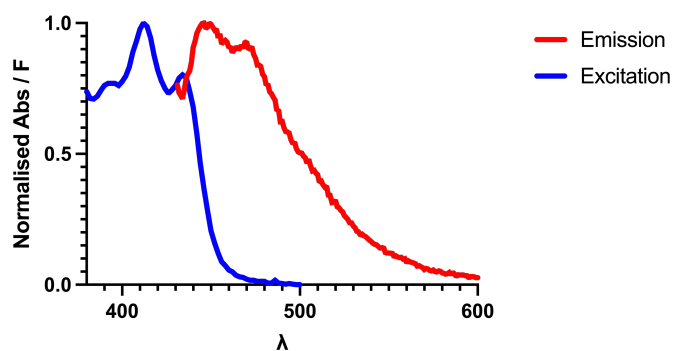

Figure S13: Excitation and emission scans of  $\text{Cu}_2\text{-DC-PyA}$  in 80mM HEPES, 25mM NaCl.

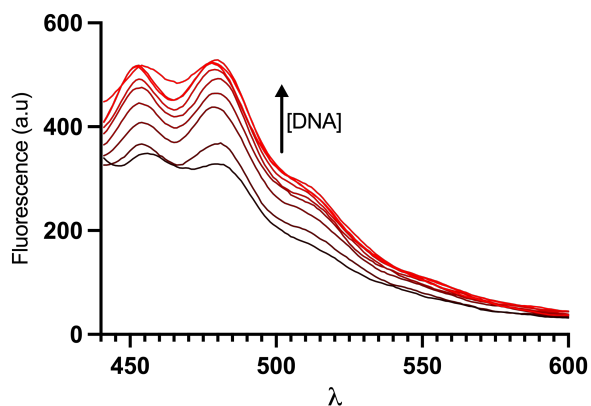

Figure S14: Fluorescence scans with a fixed ( $10\ \mu\text{M}$ ) concentration of  $\text{Cu}_2\text{-DC-PyA}$  and increasing ctDNA concentrations of ctDNA (excitation 415 nm).

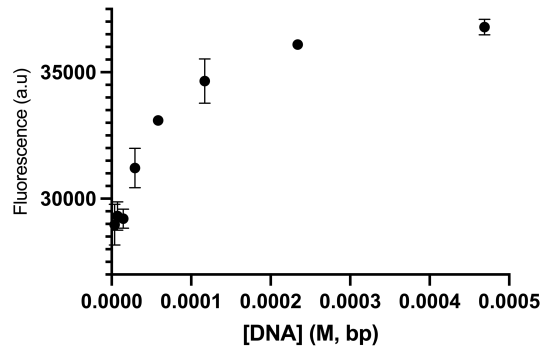

**Figure S15:** Raw fluorescence values of 10  $\mu\text{M}$   $\text{Cu}_2\text{-DC-PyA}$  with increasing ctDNA concentrations (excitation 415 nm, emission 455 nm).

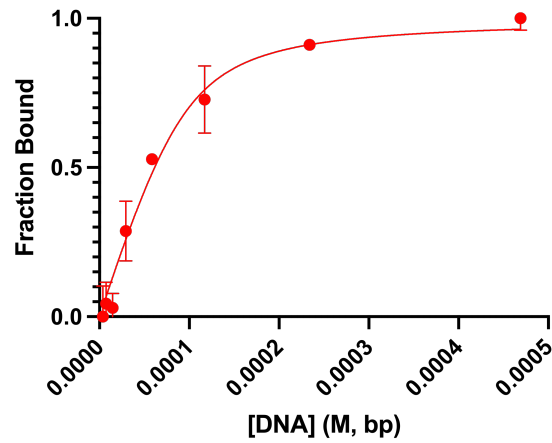

**Figure S16:** Binding curve and Bard fit of fraction bound of  $\text{Cu}_2\text{-DC-PyA}$  bound vs ctDNA concentration. Bard model was fit using equations S1 and S2.

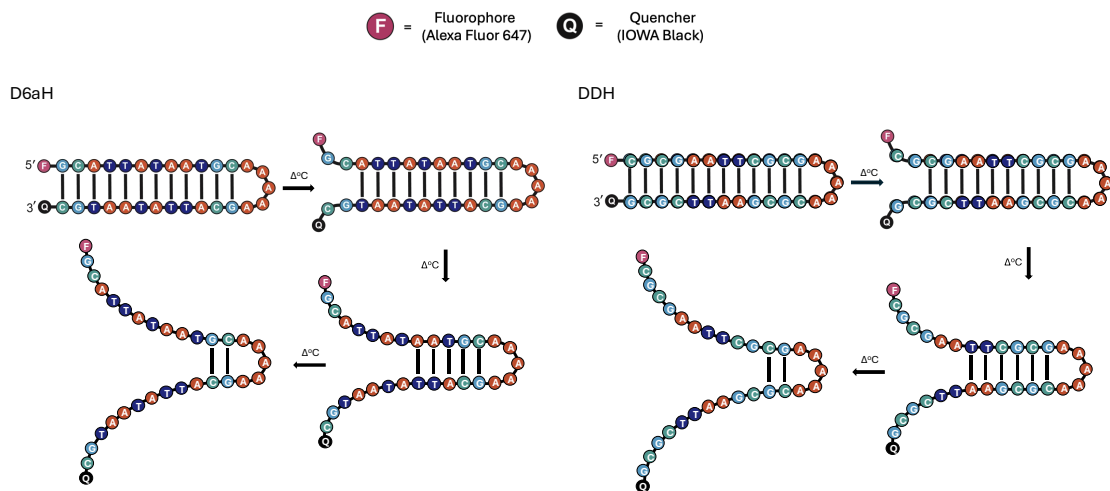

**Figure S17:** Cartoon representation of FRET melting using DNA hairpins DDH and D6aH.

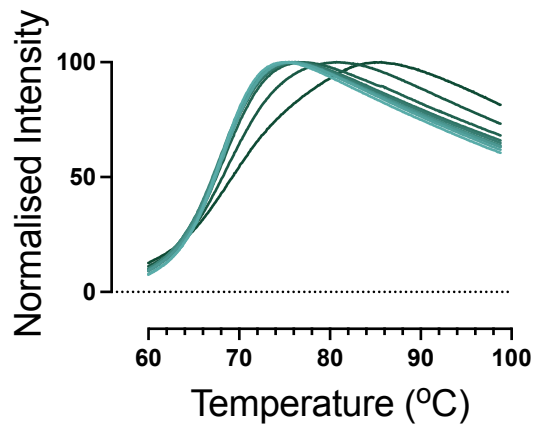

Figure S18: FRET melting curve of D6aH with Cu<sub>2</sub>-DC-PyA.

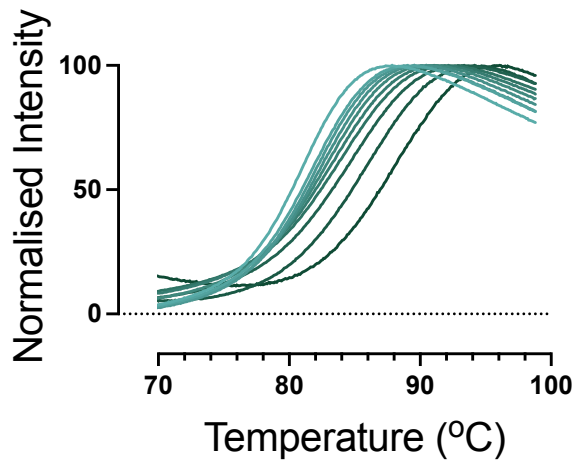

Figure S19: FRET melting curves of DDH with Cu<sub>2</sub>-DC-PyA.

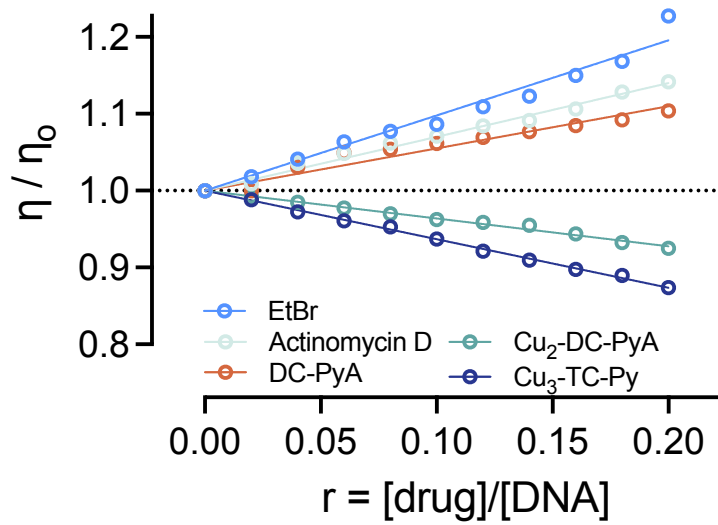

Figure S20: Plot of relative viscosity versus drug loading ratio for control and test compounds.

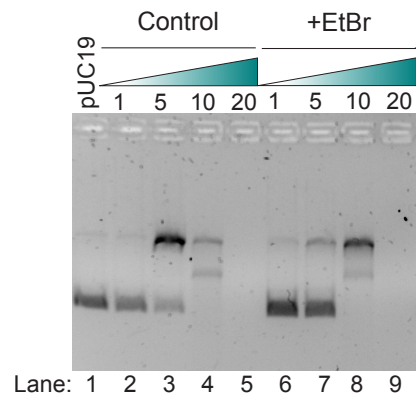

**Figure S21.** pUC19 cleavage analysis via EMSA, comparing a control concentration ramp containing 1, 5, 10 and 20  $\mu\text{M}$  Cu<sub>2</sub>-DC-PyA (lanes 2-5) to the same experiment in the presence of 8  $\mu\text{M}$  EtBr.
